# Supplementary material
Source: publisher figshare collection journal article supplement (https://gsajournals.figshare.com/ndownloader/files/25651721)
Supplement: Supplementary file 1 [file 25651721]

**File S1. Description of supplemental files**

File S2 provides detailed supplemental methods.

File S3 provides Gibson and SapTrap cloning instructions.

File S4 provides sequence files for all plasmids

Figure S1. Anti-GFP western blot with wild type (N2) control.

Figure S2. Representative images of AID*::GFP and NHR-25::GFP::AID* depletion in animals expressing either *eft-3p::mRuby2* or *eft-3p::TIR1::F2A::BFP::AID*::NLS*.

Figure S3. Nuclear/cytoplasmic ratios of AID*::GFP in VPCs with activated TIR1.

Figure S4. Functional test of new TIR1-expressing strains.

Figure S5. NHR-25::GFP::AID*::3xFLAG can be depleted in a cell-specific manner in a strain with undetectable TIR1 expression via a BFP reporter.

Table S1 provides the sequence and use for all oligonucleotides and synthetic dsDNA fragments used in this study. All sequences are written 5’ to 3’.

Table S2 lists all plasmids used in this study.

Table S3 lists all *C. elegans* used strains in this study

Table S4 lists the strains into which repair templates were injected, Cas9 and sgRNA source, and outcrossing details.

Table S5 presents the raw data used to generate Table 2 (phenotypes following depletion for *nhr-25::GFP::AID*::3xFLAG* and *nhr-23::AID*::3xFLAG* alleles).

Table S6 presents the raw data used to generate Table 3 (phenotypes following depletion of *daf-15::mNG::AID**).
